# Supplementary material for: CNV Hotspots in Testicular Seminoma Tissue and Seminal Plasma
Source: MDPI journal article supplement (doi:10.3390/cancers14010189), 2021-12-31

# CNV Hotspots in Testicular Seminoma Tissue and Seminal Plasma

Dora Raos, Irena Abramović, Miroslav Tomić, Alen Vrtarić, Tomislav Kuliš, Marijana Ćorić, Monika Ulamec, Ana Katušić Bojanac, Davor Ježek and Nino Sinčić

**Table S1.** Medians and range of obtained CNV values.

| Data                  | Groups    | MAGEC2           | RASSF1A          | NANOG            | KITLG            |
|-----------------------|-----------|------------------|------------------|------------------|------------------|
|                       |           | Median (Range)   | Median (Range)   | Median (Range)   | Median (Range)   |
| Raw data of CNV       | NTT       | 0.98 (0.63–1.14) | 2.38 (1.39–4.56) | 2.18 (1.83–3.32) | 1.58 (1.64–3.01) |
|                       | SE tissue | 1.1 (0.83–2.35)  | 2.53 (1.62–5.1)  | 5.5 (2.17–13.33) | 2.29 (1.64–3.65) |
|                       | RCLS      | 1.38 (1.35–1.43) | 1.63 (1.57–1.64) | 2.68 (2.36–3.01) | 1.92 (1.91–1.93) |
|                       | HV        | 0.89 (0.69–1.14) | 1.71 (1.35–3.28) | 1.56 (1.2–1.97)  | 1.38 (1.2–1.94)  |
|                       | preOP     | 0.89 (0.62–1.09) | 1.7 (1.34–2.14)  | 1.75 (1.32–2.89) | 1.31 (0.41–4.04) |
|                       | postOP    | 0.89 (0.62–1.5)  | 1.6 (1.2–2.26)   | 1.73 (0.75–2.46) | 1.33 (0.71–2.73) |
| Rounded number of CNV | NTT       | 1 (0)            | 2 (1–4)          | 2 (2–3)          | 2 (1–3)          |
|                       | SE tissue | 1 (1–2)          | 3 (2–5)          | 5.5 (2–13)       | 2 (2–4)          |
|                       | RCLS      | 1 (0)            | 2 (0)            | 3 (2–3)          | 2 (0)            |
|                       | HV        | 1 (0)            | 2 (1–3)          | 2 (1–2)          | 1 (1–2)          |
|                       | preOP     | 1 (0)            | 2 (1–2)          | 2 (1–2)          | 1 (1–4)          |
|                       | postOP    | 1 (1–2)          | 2 (1–2)          | 2 (1–3)          | 2 (2–4)          |

NTT, non-malignant diagnoses; SE, seminoma.; HV, healthy volunteer.

**Table S2.** Statistical tests and obtained *p*-values.

| Performed Test                            | Groups              | MAGEC2         |                | RASSF1A        |                | NANOG          |                | KITLG          |                |
|-------------------------------------------|---------------------|----------------|----------------|----------------|----------------|----------------|----------------|----------------|----------------|
|                                           |                     | Raw Data       | Rounded Value  |
|                                           |                     | <i>p</i> Value |
| Mann-Whitney test                         | NTT vs. SE tissue   | 0.0017         | 0.176          | 0.45           | 0.0108         | <0.0001        | <0.0001        | 0.001          | 0.0171         |
|                                           | HV vs. preOP        | 0.6972         | >0.9999        | 0.6922         | 0.6256         | 0.0027         | 0.0315         | 0.2366         | 0.7903         |
|                                           | HV vs. postOP       | 0.9973         | 0.3750         | 0.0674         | 0.0202         | 0.0038         | 0.0127         | 0.4333         | 0.6700         |
|                                           | RCLS vs. SE tissue  | 0.1129         | -              | 0.001          | -              | 0.0167         | -              | 0.1467         | -              |
| Wilcoxon (matched-pairs signed rank test) | preOP vs. postOP    | 0.8386         | >0.9999        | 0.1122         | 0.125          | 0.8497         | 0.6875         | 0.5042         | >0.9999        |
|                                           | preOP vs. SE tissue | <0.0001        | 0.5000         | <0.001         | <0.0001        | 0.2363         | <0.0001        | 0.0029         | 0.0016         |
| Wilcoxon signed rank test                 | RCLS vs. SE tissue  | -              | 0.0313         | -              | <0.0001        | -              | <0.0001        | -              | 0.0020         |

NTT, non-malignant diagnoses; SE, seminoma.; HV, healthy volunteer.

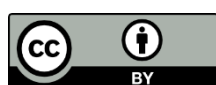

Supplement: s1 [file s1]
